# Supplementary material
Source: Springer Nature journal article supplement (https://www.springermedizin.de/resource/supplementary/13256_2009_1069_MOESM3_ESM.pdf/9646934)

Homozygous sequence

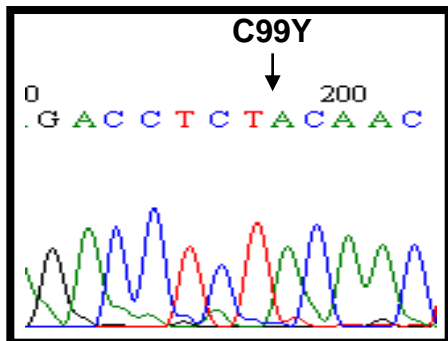

Wild type sequence

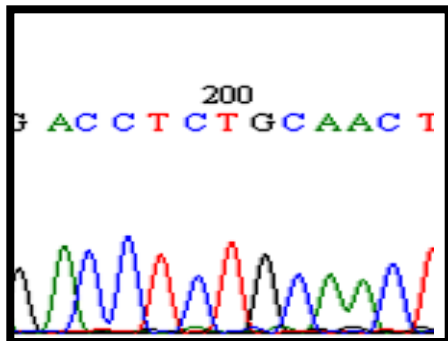

Supplement: MOESM3 [file 9646934]
